# Supplementary material for: Bromide ion-functionalized nanoprobes for sensitive and reliable pH measurement by surface-enhanced Raman spectroscopy
Source: Royal Society of Chemistry journal article supplement (doi:10.1039/c9an01699f), 2019-01-01
Supplement: c9an01699f1.pdf [file c9an01699f1.pdf]

## *Supporting information*

### **Bromide ion-assisted nanoprobe for sensitive and reliable pH measurement by surface-enhanced Raman spectroscopy**

Huiyuan Guo,<sup>a,b</sup> Qishen Huang,<sup>a,b,c</sup> Weinan Leng,<sup>a,b,c</sup> Ying Zhan,<sup>d</sup> Bahareh Behkam,<sup>d</sup> Marjorie R. Willner,<sup>a,b,c</sup> Haoran Wei,<sup>a,b,c</sup> Linsey C. Marr,<sup>a,b,c</sup> Peter J. Vikesland,<sup>a,b,c,\*</sup>

<sup>a</sup>Department of Civil and Environmental Engineering, Virginia Tech, Blacksburg, Virginia;

<sup>b</sup>Virginia Tech Institute of Critical Technology and Applied Science (ICTAS) Sustainable Nanotechnology Center (VTSuN), Blacksburg, Virginia;

<sup>c</sup>Center for the Environmental Implications of Nanotechnology (CEINT), Duke University, Durham, North Carolina;

<sup>d</sup>Department of Mechanical Engineering, Virginia Tech, Blacksburg, Virginia.

\* Corresponding author

# Methods

## 1. Surface coverage calculation

The surface coverage ( $\theta$ ) of 4-Mpy on gold nanoparticles (AuNPs) can be estimated based on the following equations:

$$\theta = S_{4\text{-Mpy}}/S_{\text{AuNPs}} \quad \text{Equation 1}$$

$$S_{4\text{-Mpy}} = AC_{4\text{-Mpy}}VN_a \quad \text{Equation 2}$$

$$S_{\text{AuNPs}} = 4\pi r^2 C_{\text{AuNPs}} VN_a \quad \text{Equation 3}$$

$$\theta = AC_{4\text{-Mpy}}VN_a / 4\pi r^2 C_{\text{AuNPs}}VN_a = AC_{4\text{-Mpy}} / 4\pi r^2 C_{\text{AuNPs}} \quad \text{Equation 4}$$

where S is the total surface area, A is the area that one surface ligand occupies, C is the molar concentration, V is the volume of the system, and  $N_a$  is the Avogadro number. In this study, the averaged molecular area (A) of 4-Mpy is  $0.25 \text{ nm}^2$ .<sup>1</sup> The average radius (r) of AuNPs is 18.2 nm. If we assume all 4-Mpy molecules ( $C_{4\text{-Mpy}} = 0.75 \text{ }\mu\text{M}$ ) are adsorbed on AuNPs ( $C_{\text{AuNPs}} = 3.4 \times 10^{-5} \text{ }\mu\text{M}$ ), the surface coverage of 4-Mpy on gold nanoparticles (AuNPs) is estimated to be 132% based on equation 4.

## 2. SERS detection volume calculation

For the Raman spectroscopy we used, the laser spot size is defined by lateral and axial dimensions, which can be calculated based on equation 5 and 6:

$$\delta_{\text{lateral}} = (0.61\lambda)/NA \quad \text{Equation 5}$$

$$\delta_{\text{axial}} = (2\lambda n)/NA^2 \quad \text{Equation 6}$$

where NA is numerical aperture of the objective,  $\lambda$  is the laser wavelength and n is a correction factor. In our case,  $NA=0.7$ ,  $\lambda=780 \text{ nm}$ , and  $n=1$ . Inputting these parameters into equation 1 and

2, we obtained the values of  $\delta_{\text{lateral}}$  and  $\delta_{\text{axial}}$  as 0.68  $\mu\text{m}$  and 3.2  $\mu\text{m}$ . If we assume the laser spot is cylindrical, the detection volume is 1.2  $\mu\text{m}^3$ .

## Figures

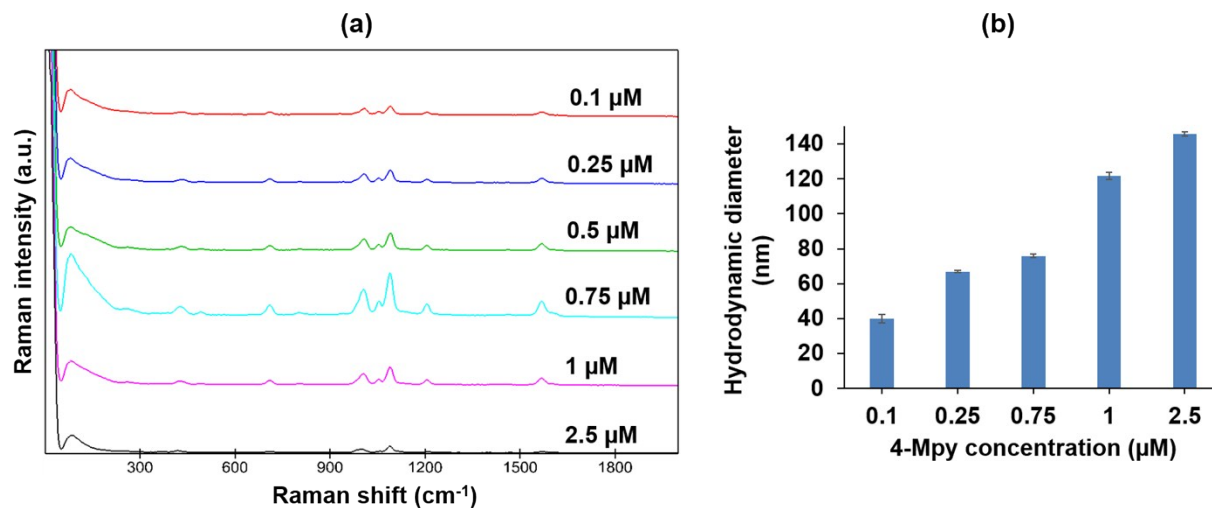

Figure S1. Selection of 4-Mpy concentration based on SERS spectra (a) and hydrodynamic diameter (b). The spectra in (a) were offset to show the differences clearly.

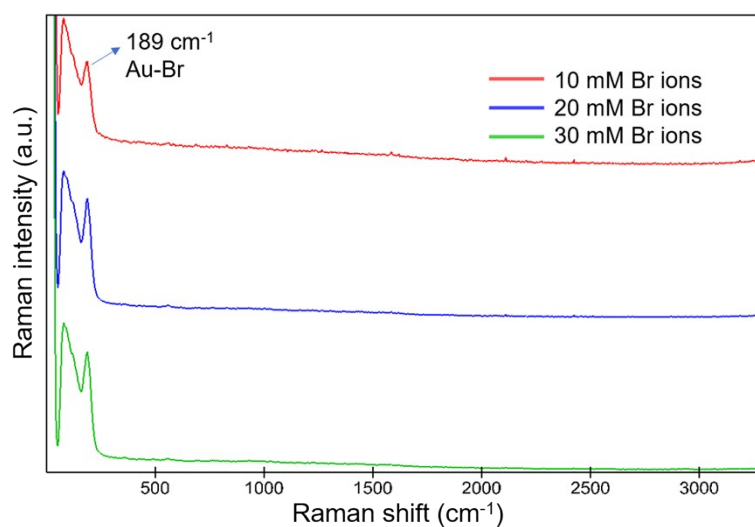

Figure S2. SERS spectra of AuNPs after modification by different concentrations of Br<sup>-</sup> in the absence of 4-Mpy and PEG.

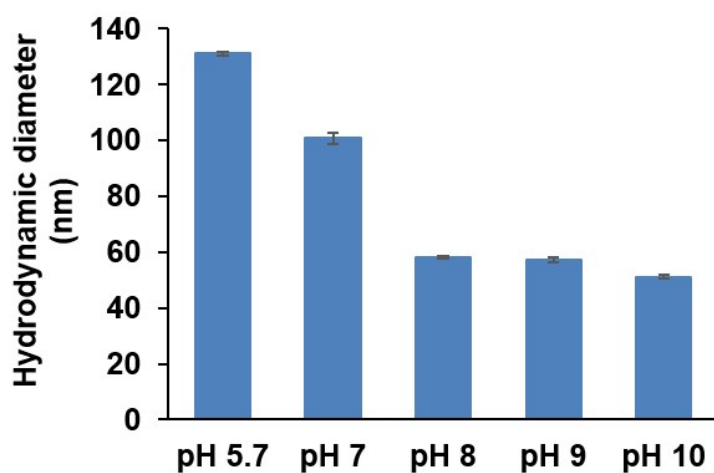

Figure S3. Hydrodynamic diameter (nm) of nanoprobe functionalized at different pHs by 0.75  $\mu\text{M}$  4-Mpy and 20 mM  $\text{Br}^-$ , and coated by 0.01  $\mu\text{M}$  PEG.

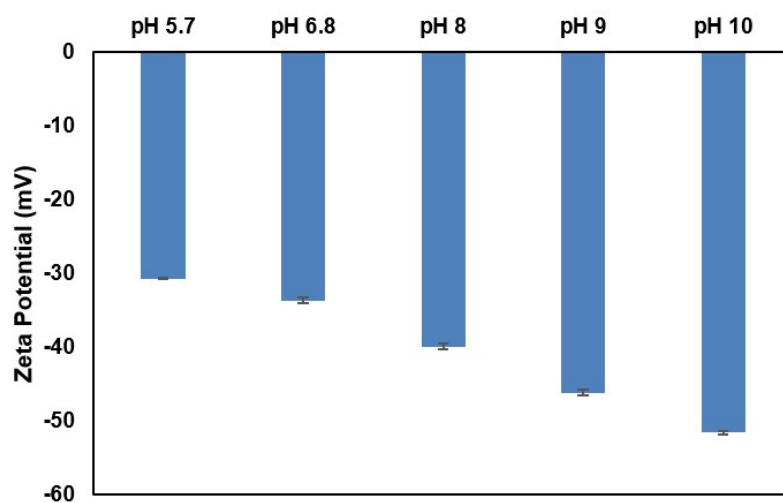

Figure S4. Zeta potential of AuNPs functionalized by 4-Mpy (0.75  $\mu\text{M}$ ) at different pHs. The zeta potential was measured after centrifuging (4500 rpm, 15 min) 4-Mpy-functionalized AuNPs and resuspending them in nanopure water.

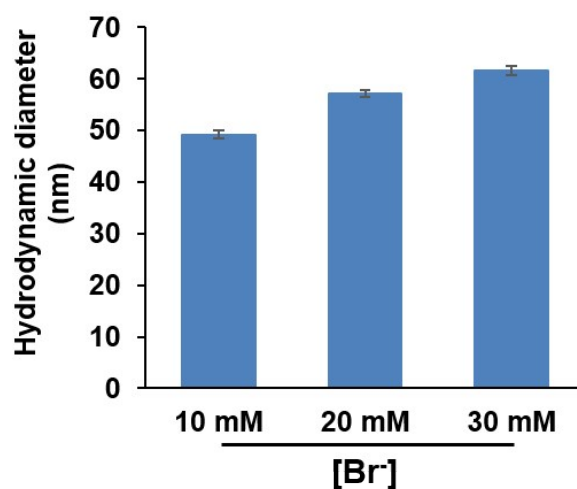

Figure S5. Hydrodynamic diameter (nm) of nanoprobe functionalized at pH 9 by 0.75  $\mu\text{M}$  4-Mpy and different  $[\text{Br}^-]$ , and coated by 0.01  $\mu\text{M}$  PEG.

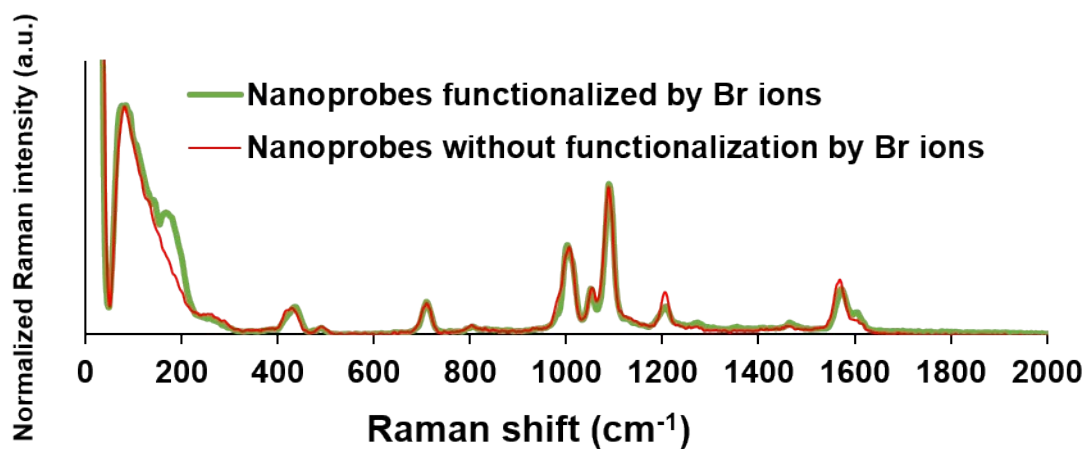

Figure S6. SERS spectra of nanoprobe without and with functionalization by bromide ions. The spectra are normalized to the elastic scattering peak at 81  $\text{cm}^{-1}$  in order to exclude the variation caused by SERS “hotspots” and demonstrate the coverage of 4-Mpy on AuNP surface.

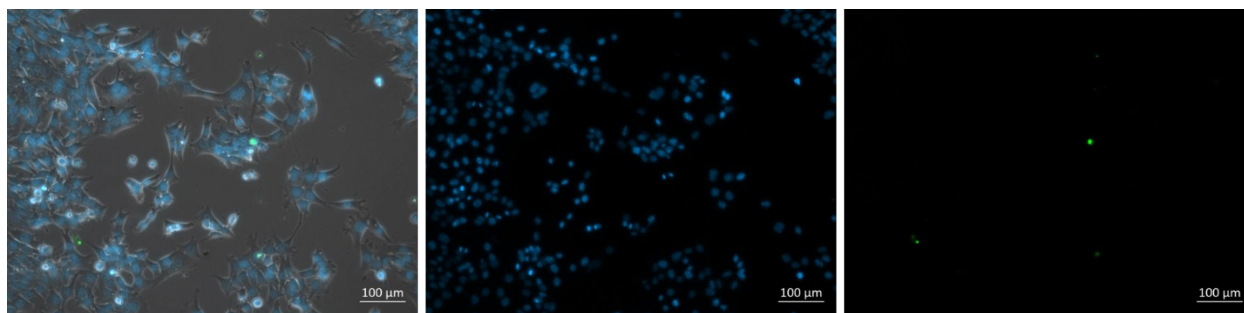

Figure S7. Cancer cell viability assay after nanoprobe internalization and SERS analysis. A composite bright-field and fluorescence microscopy image of the cells is shown on the left. The fluorescence microscopy images show live cells (blue, middle) and dead cells (green, right). The cell viability was calculated to be 99.6% based on 272 cells. All scale bars are 100  $\mu\text{m}$ .

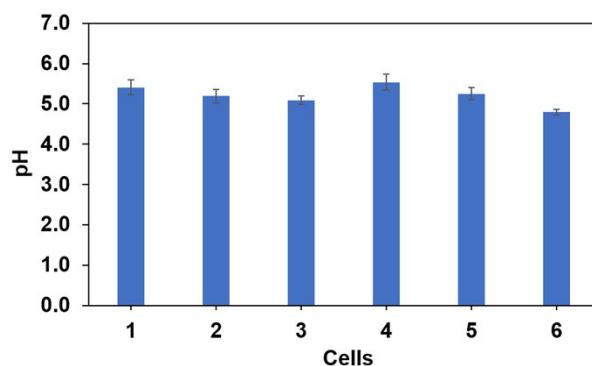

Figure S8. Average pH values in cancer cells measured by the developed nanoprobe using SERS surface mapping.

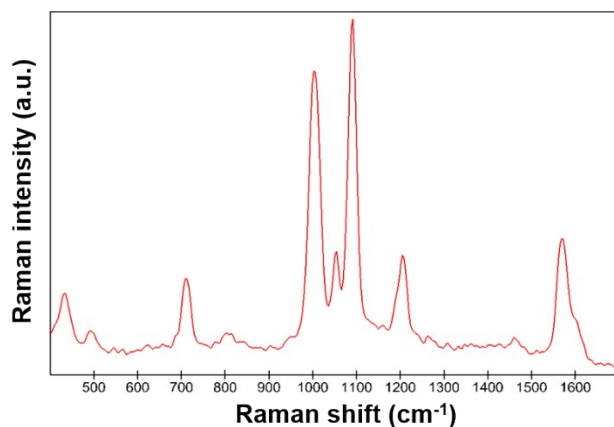

Figure S9. A representative SERS spectrum of the pH-sensing nanoprobe in cancer cells.

Table S1. SERS peak assignments of the developed nanoprobe<sup>2-4</sup>

| Peak position (cm <sup>-1</sup> ) | Peak intensity | Assignment                                                 |
|-----------------------------------|----------------|------------------------------------------------------------|
| 81                                | s              | Elastic scattering                                         |
| 172                               | w              | Br-Au                                                      |
| 431                               | m              | $\delta(\text{C-S})/\gamma(\text{CCC})$                    |
| 710                               | m              | $\beta(\text{CC})/\nu(\text{C-S})$                         |
| 1006                              | s              | Ring breathing                                             |
| 1054                              | m              | $\delta(\text{CH})$                                        |
| 1091                              | s              | Ring breathing/C-S                                         |
| 1208                              | m              | $\beta(\text{CH})/\delta(\text{NH})$                       |
| 1572                              | m              | 8b <sub>2</sub> ring stretching with deprotonated nitrogen |
| 1606                              | m              | 8b <sub>2</sub> ring stretching with protonated nitrogen   |

## References

- (1) Bi, X.; Du, X.; Jiang, J.; Huang, X. Facile and Sensitive Glucose Sandwich Assay Using in Situ -Generated Raman Reporters. *Anal. Chem.* **2015**, 87 (3), 2016–2021.
- (2) Hu, J.; Zhao, B.; Xu, W.; Li, B.; Fan, Y. Surface-Enhanced Raman Spectroscopy Study on the Structure Changes of 4-Mercaptopyridine Adsorbed on Silver Substrates and Silver Colloids. *Spectrochim. Acta - Part A Mol. Biomol. Spectrosc.* **2002**, 58 (13), 2827–2834.
- (3) Do, W. H.; Lee, C. J.; Kim, D. Y.; Jung, M. J. Adsorption of 2-Mercaptopyridine and 4-Mercaptopyridine on a Silver Surfaces Investigated by SERS Spectroscopy. *J. Ind. Eng. Chem.* **2012**, 18 (6), 2141–2146.
- (4) Zheng, X.; Hu, P.; Zhong, J.; Zong, C.; Wang, X.; Liu, B.; Ren, B. Laser Power Dependent Surface-Enhanced Raman Spectroscopic Study of 4 - Mercaptopyridine on Uniform Gold Nanoparticle- Assembled Substrates. *J. Phys. Chem. C* **2014**, 118, 3750–3757.
